# Supplementary material
Source: PubMed Central journal article supplement (PMC3347303)
Supplement: supp_86.10.5562_TableS1-S2_FigS1-S2.pdf [file supp_86.10.5562_TableS1-S2_FigS1-S2.pdf]

TABLE S1. Location of hot springs surveyed in Yellowstone National Park, USA.

| <b>Sample Name</b> | <b>Lat</b>   | <b>Long</b>   | <b>Date</b> | <b>pH</b> | <b>Temperature (°C)</b> |
|--------------------|--------------|---------------|-------------|-----------|-------------------------|
| Amp-21             | N44 48.06666 | W110 43.72332 | Aug-09      | 2.0       | 76                      |
| Amp-22             | N44 47.82834 | W110 43.46664 | Aug-09      | 2.0       | 90                      |
| Mon-1              | N44 41.09832 | W110 45.24498 | Aug-09      | 1.5       | 86                      |
| Mon-2              | N44 41.09502 | W110 45.22998 | Aug-09      | 1.5       | 75                      |
| Mon-3              | N44 42.755   | W110 45.22998 | Aug-09      | 1.5       | 70                      |
| Mon-4              | N44 42.74833 | W110 45.23334 | Aug-09      | 1.5       | 87                      |
| Mon-5              | N44 41.79498 | W110 45.22998 | Aug-09      | 1.5       | 79                      |
| Mon-6              | N44 41.07666 | W110 45.23502 | Aug-09      | 1.5       | 79                      |
| Mon-7              | N44 41.055   | W110 45.22002 | Aug-09      | 1.5       | 69                      |
| NL-10              | N44 45.214   | W110 43.432   | Aug-09      | 4.5       | 93                      |
| NL-17              | N44 45.11832 | W110 43.70832 | Aug-09      | 2.0       | 81                      |
| NL-18              | N44 45.12666 | W110 43.71336 | Aug-09      | 2.0       | 83                      |
| NL-19              | N44 45.12168 | W110 43.71834 | Aug-09      | 2.0       | 78                      |
| NL-20              | N44 45.12834 | W110 43.72164 | Aug-09      | 3.0       | 85                      |
| SL-1               | N44 21.45167 | W110 47.61333 | Aug-09      | 6.0       | 83                      |
| SL-2               | N44 21.38    | W110 47.77666 | Aug-09      | 3.0       | 89                      |
| SL-3               | N44 21.225   | W110 47.84    | Aug-09      | 2.5       | 83                      |
| SL-4               | N44 21.01    | W110 47.35016 | Aug-09      | 5.0       | 80                      |
| SL-5               | N44 21.1     | W110 47.99833 | Aug-09      | 4.0       | 81                      |
| SL-6               | N44 21.1     | W110 47.98    | Aug-09      | 5.0       | 85                      |

|        |              |               |        |     |    |
|--------|--------------|---------------|--------|-----|----|
| Syl-8  | N44 41.99502 | W110 45.91998 | Aug-09 | 3.5 | 77 |
| Syl-9  | N44 41.95836 | W110 46.03836 | Aug-09 | 5.0 | 82 |
| Syl-10 | N44 41.96832 | W110 46.07832 | Aug-09 | 2.0 | 86 |
| Syl-11 | N44 43.63666 | W110 46.09002 | Aug-09 | 2.0 | 87 |
| Syl-12 | N44 41.95836 | W110 46.11666 | Aug-09 | 1.5 | 80 |
| Syl-13 | N44 41.93334 | W110 46.10832 | Aug-09 | 5.0 | 81 |
| Syl-14 | N44 42       | W110 46.24002 | Aug-09 | 2.0 | 73 |
| Syl-15 | N44 42.03498 | W110 45.96666 | Aug-09 | 4.5 | 85 |

TABLE S2. PCR primers used to confirm selected contigs from the RNA virus metagenomes.

| Name              | Sequence             | Start | End  | Length |
|-------------------|----------------------|-------|------|--------|
| Contig00002 2192F | TTTAGCGGTCACGCCGGCTG | 2192  | 2211 | 20     |
| Contig00002 2756R | CGCTCCAGCTCACGTCGTGG | 2737  | 2756 | 20     |
| Contig00009 702F  | ATTGTGAGCTACGCGCGGGG | 702   | 721  | 20     |
| Contig00009 1337R | GGCGAGGAAACCCGTGTGCT | 1318  | 1337 | 20     |

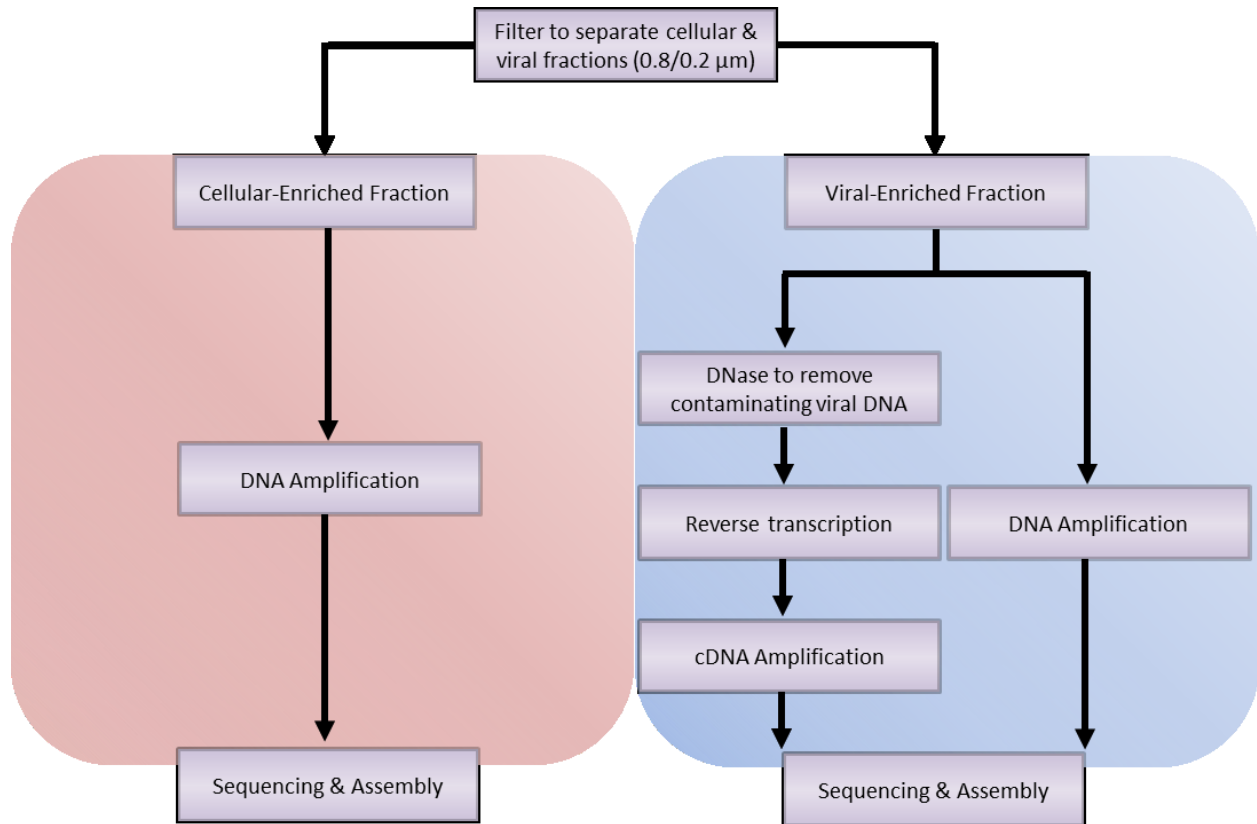

FIG. S1. Overview of the experimental flow to produce viral RNA enriched, viral DNA enriched, and cellular enriched metagenomes.

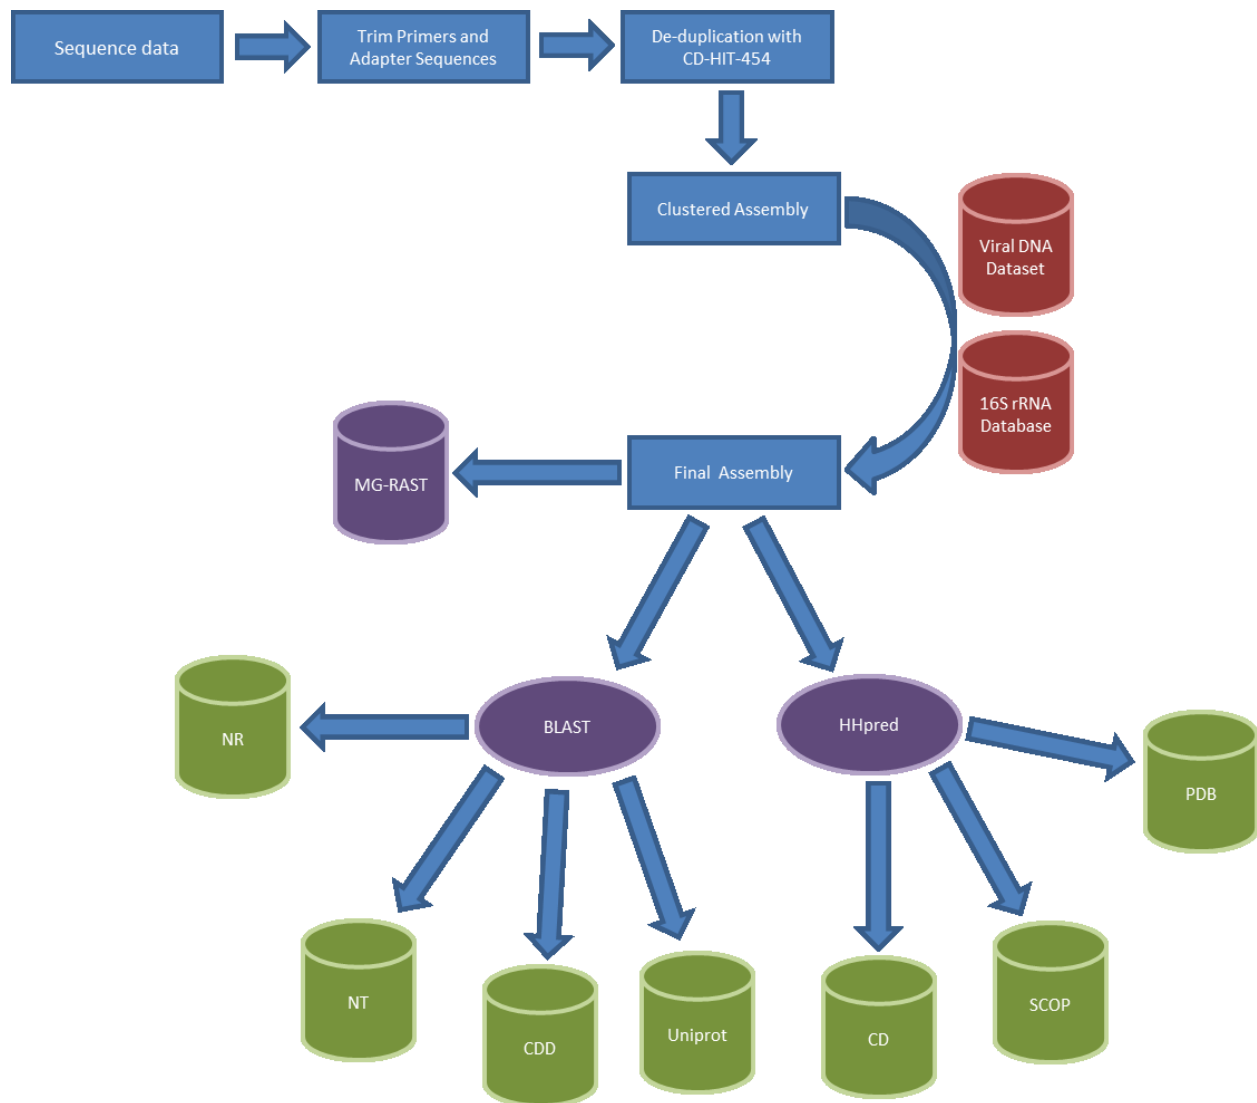

FIG. S2. Metagenomic viral RNA assembly outline. Raw sequence data was processed through a series of quality checks and redundant sequences are removed. Assembled contigs were compared against the paired viral DNA metagenomes and 16S rRNA databases. Matching contigs were removed from further analysis. Contigs are compared against a number of databases using a NCBI BLAST, MG-RAST and selected contigs against HHpred.

Statistical tests on constrained tree topologies with different positions of the putative archaeal virus RdRp. Likelihood and p-values for constrained trees (see Methods).

| Tree #        | LL       | $\Delta$ LL          | p     |
|---------------|----------|----------------------|-------|
| Unconstrained | -67716.4 | n/a                  | >0.05 |
| 1             | -67733.8 | -17.5 $\square$ 16.2 | >0.05 |
| 2             | -67717.8 | -1.5 $\square$ 13.9  | >0.05 |
| 3             | -67732.1 | -15.7 $\square$ 18.6 | >0.05 |
| 4             | -67742.6 | -26.3 $\square$ 20.4 | >0.05 |
| 5             | -67731.2 | -14.8 $\square$ 19.3 | >0.05 |
| 6             | -67728.9 | -12.5 $\square$ 14.0 | >0.05 |
| 7             | -67735.7 | -19.3 $\square$ 20.5 | >0.05 |
| 8             | -67739.2 | -22.8 $\square$ 20.0 | >0.05 |
| 9             | -67731.3 | -14.9 $\square$ 18.7 | >0.05 |
| 10            | -67718.9 | -2.6 $\square$ 11.5  | >0.05 |

LL – Log Likelihood

$\Delta$ LL – Log Likelihood difference compared to the unconstrained tree p – p-value

Tree topologies in Newick format
